# Supplementary material
Source: Springer Nature journal article supplement (https://www.springermedizin.de/resource/supplementary/12911_2006_141_MOESM6_ESM.pdf/9527216)
Supplement: MOESM6 [file 9527216]

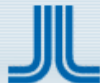

## Hantera mallar: GynOp light - Intrabdominell kirurgi - Bukvaggssincision\_typ

[ Administration ]

[Visa variabler >>](#)  
[Hantera mallar >>](#)

[Logga ut](#)

**Lägg till fält >>**

**Välj fält:**

Operation\_route\_initial ▲  
Konvertering\_till\_laparotomi  
Bukvaggssincision\_typ  
Operationsförhållanden\_försvarede  
OpKomp\_perop  
OpKomp\_perop\_skadetyf  
Cystdiameter\_initialt  
Blodning\_peroperativt  
Blodtransfusion\_peroperativt ▼

Spara

Spara

Ta bort fält

|                        |                                                               |
|------------------------|---------------------------------------------------------------|
| Namn:                  | Bukvaggssincision_typ (928)                                   |
| Fältyp:                | valueset                                                      |
| Etikett:               | Bukvaggssincision                                             |
| Beskrivning:           | V g ange använd<br>bukvaggssincision.                         |
| Enhet:                 |                                                               |
| Kodtabell:             | gynop_bukvaggssincision                                       |
| Highlight              | None                                                          |
| Multiple Value Support | <input type="radio"/> Ja <input checked="" type="radio"/> Nej |
| Enter Value Once Only  | <input type="radio"/> Ja <input checked="" type="radio"/> Nej |
